# Supplementary material
Source: Research Square preprint supplement (doi:10.21203/rs.3.rs-9349163/v1)
Supplement: Supplementary file 1 [file 7d737429cafe40899295c4ae.docx]

Table (S1). Two-way ANOVA analysis of the effect of samarium, AMF and their interaction on yield parameters and metabolites of oat plant. Data of P values marked in bold when being significant.

| **Parameter** | **AMF** | **Sm** | **AMF X Sm** |
| --- | --- | --- | --- |
| Sm ‎content | **0.002** | **0** | **0.011** |
| Seed size | **0.013** | **0** | 0.343 |
| Weight of 100 seeds | **0.025** | **0** | 0.131 |
| Grain NO. per plant | **0.037** | **0** | 0.184 |
| Photosynthesis at harvest time | 0.163 | **0** | 0.362 |
| P | 0.097 | 0.713 | **0.013** |
| S | **0.017** | **0** | **0.005** |
| K | 0.357 | **0** | 0.103 |
| Mg | **0** | **0.001** | **0.005** |
| Ca | **0** | **0** | 0.124 |
| Na | 0.642 | 0.201 | 0.209 |
| Zn | **0.001** | **0.001** | **0.027** |
| Fe | **0** | **0** | **0.004** |
| Cu | 0.119 | 0.073 | **0.001** |
| Mn | 0.09 | 0.097 | **0.008** |
| Al | 0.407 | 0.331 | 0.084 |
| Dodecanoic (C12:0) | 0.566 | 0.344 | 0.559 |
| Tetradecanoic (C14:0) | 0.118 | 0.623 | 0.353 |
| Pentadecanoic (C15:0) | 0.257 | 0.324 | 0.75 |
| Hexadecanoic (C16:0) | **0.019** | 0.448 | 0.927 |
| Hexadecanoic (C16:1 | **0** | **0.001** | 0.156 |
| Hexadecadienoic (C16:2) | **0** | **0.001** | 0.156 |
| Hexadecatrienoic (C16:3) | **0** | **0.001** | 0.156 |
| Heptadecanoic (C17:0) | 0.153 | 0.186 | 0.508 |
| Octadecanoic (C18:0) | **0.002** | **0.01** | 0.258 |
| Octadecenoic (18:1) | 0.054 | 0.067 | 0.083 |
| Octadecatrienoic (C18:3) | **0.033** | **0.034** | 0.134 |
| Eicosanoic (C20:0) | **0** | 0.862 | 0.621 |
| Eicosadienoic (C20:2) | **0.006** | 0.079 | 0.221 |
| Docosanoic (C22:0) | **0** | **0.043** | 0.286 |
| Tetracosanoic (C24:0) | 0.314 | 0.407 | 0.581 |
| Tetracosenoic (C24:1) | **0.001** | 0.183 | 0.276 |
| Pentacosanoic (C25:0) | 0.065 | **0.036** | 0.084 |
| Hexacosanoic (26:0) | 0.677 | **0.03** | 0.103 |
| Phenolic | 0.134 | **0.006** | 0.588 |
| Flavonoids | 0.078 | **0** | 0.203 |
| FRAP | 0.488 | **0** | **0.009** |
| DPPH | 0.275 | **0** | **0.025** |
| ABTS | **0.041** | 0.072 | 0.737 |
| Alfa toc. | **0.009** | **0** | 0.483 |
| Beta toc. | 0.108 | **0.012** | 0.269 |
| Gamma toc. | 0.096 | 0.068 | 0.992 |
| TOTAL toc. | **0.012** | **0** | 0.648 |
| Glucose | 0.284 | **0.003** | 0.108 |
| Starch | 0.496 | 0.273 | 0.683 |
| Amylase | 0.134 | 0.176 | 0.104 |
| Starch Synthase | **0.008** | 0.189 | 0.947 |
| Lactate | **0.003** | **0.005** | 0.934 |
| Citrate | **0.003** | **0.006** | 0.936 |
| Trans-aconitic | 0.188 | 0.287 | 0.636 |
| Succinate | **0.003** | **0.004** | 0.931 |
| Malate | **0.011** | 0.062 | 0.263 |
| Oxalate | **0.04** | 0.33 | 0.757 |
| Proline | 0.22 | **0** | 0.336 |
| Glycine | **0.036** | 0.795 | **0.051** |
| Serine | **0.005** | 0.466 | **0.029** |
| Argnine | **0.001** | 0.194 | **0.006** |
| Ornithine | **0.014** | **0.006** | 0.16 |
| Glutamine | 0.087 | 0.104 | 0.725 |
| Glutamate | **0.003** | 0.36 | 0.3 |
| Aspartate | 0.163 | 0.56 | 0.979 |
| Cystine | 0.31 | **0.003** | **0** |
| Asparagine | **0** | 0.282 | 0.184 |
| Leucine | **0.044** | 0.273 | **0.013** |
| Lysine | **0** | **0.001** | 0.062 |
| Histidine | **0** | 0.769 | 0.083 |
| Alanine | **0** | 0.925 | 0.077 |
| Isoleucine | 0.438 | 0.931 | 0.262 |
| Methionine | 0.68 | 0.972 | 0.332 |
| Threonine | 0.069 | 0.168 | 0.325 |
| Valine | **0** | **0** | **0** |
| Phenylalanine | 0.451 | **0.002** | **0.004** |
| Tyrosine | 0.173 | 0.091 | 0.856 |
| Glutamine synthetase (GS) | 0.269 | 0.483 | 0.633 |
| Glutamate dehydrogenase (GDH) | 0.061 | 0.307 | 0.271 |
